# Supplementary material for: Analytical Evaluation of an NGS Testing Method for Routine Molecular Diagnostics on Melanoma Formalin-Fixed, Paraffin-Embedded Tumor-Derived DNA
Source: Diagnostics (Basel). 2019 Sep 12;9(3):117. doi: 10.3390/diagnostics9030117 (PMC6787639; doi:10.3390/diagnostics9030117)
Supplement: Supplementary file 1 [file diagnostics-09-00117-s001.pdf]

| Sample with BRAF mutation                              | Gene with additional mutations |     |      |     |      |        |      |       |       |     |     |              |             |              |
|--------------------------------------------------------|--------------------------------|-----|------|-----|------|--------|------|-------|-------|-----|-----|--------------|-------------|--------------|
|                                                        | None                           | R13 | E2H2 | KDR | TP53 | PDGFRA | AKT1 | FBXW7 | ERBB4 | KIT | APC | PIK3CA       | CDKN2A      | HRAS         |
| Activating BRAF mutations                              |                                |     |      |     |      |        |      |       |       |     |     |              |             |              |
| MEL2 (p.Val600Glu)                                     | X                              |     |      |     |      |        |      |       |       |     |     |              |             |              |
| MEL4 (p.Val600Glu)                                     |                                |     |      |     |      |        |      |       |       |     |     | p.A680Ter    |             |              |
| MEL6 (p.Val600Glu)                                     |                                |     |      |     |      |        |      |       |       |     |     | p.M611D31E   |             |              |
| MEL11 (p.Val600Glu complex)                            |                                |     |      |     |      |        |      |       |       |     |     | p.T123NMet   |             |              |
| MEL5 (p.Val600Arg)                                     |                                |     |      |     |      |        |      |       |       |     |     | p.A6827Glu   | p.A6857Glu  |              |
| MEL12 (p.Val600Lys)                                    |                                |     |      |     |      |        |      |       |       |     |     |              | p.Ser127Phe |              |
| MEL13 (p.Val600_Lys601delinsGlu)                       |                                |     |      |     |      |        |      |       |       |     |     |              |             | X            |
| MEL15-MEL16 (p.Val600Glu at 3.6%)                      |                                |     |      |     |      |        |      |       |       |     |     |              |             | X            |
| MEL21 (p.Val600Arg at 4.9%)                            |                                |     |      |     |      |        |      |       |       |     |     |              | p.Gln61Lys  |              |
| Intermediate activity BRAF mutations                   |                                |     |      |     |      |        |      |       |       |     |     |              |             |              |
| MEL7 (p.Asn581Ser)                                     |                                |     |      |     |      |        |      |       |       |     |     | p.Cys420Arg  |             |              |
| MEL9 (p.Leu597Gln)                                     |                                |     |      |     |      |        |      |       |       |     |     | p.Glu1317Gln |             |              |
| MEL20-MEL19 (p.Gly466Arg)                              |                                |     |      |     |      |        |      |       |       |     |     | p.A680Ter    |             |              |
|                                                        |                                |     |      |     |      |        |      |       |       |     |     | p.Gly124Asp  |             |              |
| Inactivating BRAF mutations                            |                                |     |      |     |      |        |      |       |       |     |     |              |             |              |
| MEL8 (p.Asp594Asn)                                     |                                |     |      |     |      |        |      |       |       |     |     | p.Gly124Asp  |             |              |
| MEL14 (p.Asp594Asn)                                    |                                |     |      |     |      |        |      |       |       |     |     | p.Gln61His   |             |              |
| MEL10 (p.Gly596Val)                                    |                                |     |      |     |      |        |      |       |       |     |     | p.Gln61Arg   |             |              |
|                                                        |                                |     |      |     |      |        |      |       |       |     |     |              | p.Pro685Ser |              |
| BRAF wild-type                                         |                                |     |      |     |      |        |      |       |       |     |     |              |             |              |
| MEL1                                                   |                                |     |      |     |      |        |      |       |       |     |     | p.Gln61Leu   | p.Pro681Leu |              |
| MEL3                                                   |                                |     |      |     |      |        |      |       |       |     |     | p.Gln61Arg   |             |              |
| MEL18-MEL17                                            |                                |     |      |     |      |        |      |       |       |     |     |              |             | p.Ser111Phe  |
|                                                        |                                |     |      |     |      |        |      |       |       |     |     |              |             | p.Tyr664Ter  |
|                                                        |                                |     |      |     |      |        |      |       |       |     |     |              |             | p.Lys668His  |
|                                                        |                                |     |      |     |      |        |      |       |       |     |     |              |             | p.Gly1284Arg |
| ClinVar/SIFT/PolyPhen: Pathogenic or likely pathogenic |                                |     |      |     |      |        |      |       |       |     |     |              |             |              |
| ClinVar/SIFT/PolyPhen: conflicting interpretation      |                                |     |      |     |      |        |      |       |       |     |     |              |             |              |
| ClinVar/SIFT/PolyPhen: benign                          |                                |     |      |     |      |        |      |       |       |     |     |              |             |              |

**Figure S1. Identified mutations in FFPE samples.** All the identified variants are reported. Each column represents a mutated gene and each row represents a sample. Samples are categorized in relation to the ascribed effect of the mutation on the BRAF protein activity. The additional mutation boxes are highlighted on the basis of the predicted effect.

**Table S1.** Quality parameters and coverage of FFPE samples performed by NGS.

| Sample MEL | Library (pmol/L) | Bases     | >=Q20     | Reads   | Reads Mean lenght (bp) | Mapped Reads | On Target | Mean Depth | % of amplicon with at least 500x | % of amplicon with at least 100x | Uniformity | Amplicons with lower than 500 reads | Amplicons with lower than 100 reads |
|------------|------------------|-----------|-----------|---------|------------------------|--------------|-----------|------------|----------------------------------|----------------------------------|------------|-------------------------------------|-------------------------------------|
| 1          | 266              | 106728410 | 101938290 | 935415  | 114                    | 934005       | 85.46%    | 3713       | 98,6                             | 100,0                            | 98.52%     | 3                                   | 0                                   |
| 2          | 188              | 132124958 | 126292682 | 1153026 | 115                    | 1150097      | 88.83%    | 4750       | 99,5                             | 100,0                            | 94.91%     | 1                                   | 0                                   |
| 3          | 51               | 110421513 | 105780845 | 983297  | 112                    | 958773       | 96.53%    | 4344       | 100,0                            | 100,0                            | 100.00%    | 0                                   | 0                                   |
| 4          | 150              | 107194613 | 102524590 | 967973  | 111                    | 965754       | 87.47%    | 3881       | 99,5                             | 100,0                            | 98.03%     | 1                                   | 0                                   |
| 5          | 186              | 112826451 | 107891647 | 1007614 | 112                    | 1005357      | 84.76%    | 3965       | 99,0                             | 100,0                            | 98.52%     | 2                                   | 0                                   |
| 6          | 311              | 118383119 | 112991229 | 999407  | 118                    | 998243       | 88.16%    | 4156       | 99,5                             | 100,0                            | 98.17%     | 1                                   | 0                                   |
| 7          | 187              | 114968508 | 109009271 | 1022823 | 112                    | 1020411      | 97.01%    | 4543       | 95,7                             | 100,0                            | 89.00%     | 9                                   | 0                                   |
| 8          | 90               | 65428547  | 61979152  | 608819  | 107                    | 607085       | 93.48%    | 2553       | 94,7                             | 100,0                            | 92.75%     | 11                                  | 0                                   |
| 9          | 75               | 55847911  | 52996111  | 572171  | 98                     | 570357       | 82.08%    | 2006       | 94,7                             | 100,0                            | 96.29%     | 11                                  | 0                                   |
| 10         | 662              | 114570811 | 108203065 | 979578  | 117                    | 978676       | 95.54%    | 4426       | 99,0                             | 100,0                            | 98.22%     | 2                                   | 0                                   |
| 11         | 128              | 75338077  | 71497953  | 687284  | 110                    | 686401       | 96.68%    | 2992       | 98,1                             | 100,0                            | 96.77%     | 4                                   | 0                                   |
| 12         | 386              | 92883182  | 88223655  | 812907  | 114                    | 812294       | 97.38%    | 3693       | 99,5                             | 100,0                            | 98.08%     | 1                                   | 0                                   |
| 13         | 1169             | 105638869 | 100157652 | 904544  | 117                    | 903833       | 97.04%    | 4101       | 99,0                             | 99,5                             | 97.95%     | 2                                   | 1                                   |
| 14         | 412              | 128754379 | 122066099 | 1134610 | 113                    | 1133565      | 96.75%    | 5086       | 99,5                             | 100,0                            | 98.46%     | 1                                   | 0                                   |
| 15         | 99               | 50348751  | 47598296  | 467207  | 108                    | 466411       | 92.21%    | 1919       | 86,5                             | 99,0                             | 87.68%     | 28                                  | 2                                   |
| 16         | 492              | 73629701  | 69815499  | 643732  | 114                    | 643152       | 93.58%    | 2795       | 97,6                             | 99,5                             | 96.79%     | 5                                   | 1                                   |
| 17         | 376              | 72330552  | 68350119  | 629290  | 115                    | 628600       | 96.12%    | 2837       | 98,6                             | 100,0                            | 96.46%     | 3                                   | 0                                   |
| 18         | 132              | 54799548  | 51938524  | 505571  | 108                    | 505091       | 97.83%    | 2227       | 97,1                             | 100,0                            | 96.68%     | 6                                   | 0                                   |
| 19         | 117              | 53572368  | 50636789  | 485481  | 110                    | 484838       | 94.30%    | 2098       | 97,1                             | 100,0                            | 97.59%     | 6                                   | 0                                   |
| 20         | 34               | 38650584  | 36522475  | 363853  | 106                    | 362584       | 96.41%    | 1545       | 78,3                             | 97,6                             | 87.86%     | 45                                  | 5                                   |
| 21         | 228              | 49452569  | 46956005  | 456092  | 108                    | 455708       | 97.20%    | 2002       | 98,1                             | 100,0                            | 98.27%     | 4                                   | 0                                   |

**Table S2.** Analysis of samples with classical BRAF or NRAS variants: comparison of results among different methods.

| SAMPLE | NGS (mutant allele fraction) | Conventional methods |               |                                      |
|--------|------------------------------|----------------------|---------------|--------------------------------------|
|        |                              | Sequenom             | HRMA+Sanger   | castPCR for BRAF                     |
|        |                              |                      |               | p.Val600Glu (mutant allele fraction) |
| MEL-1  | BRAF wt                      | BRAF wt              | BRAF wt       | BRAF wt                              |
|        | NRAS p.Gln61Leu (40.1%)      | NRAS p.Gln61Leu      | not performed | not performed                        |
|        | KRAS wt                      | KRAS wt              | not performed | not performed                        |
|        | PIK3CA wt                    | PIK3CA wt            | not performed | not performed                        |
| MEL-2  | BRAF p.Val600Glu (47.7%)     | BRAF p.Val600Glu     | not performed | not performed                        |
|        | NRAS wt                      | NRAS wt              | not performed | not performed                        |
|        | KRAS wt                      | KRAS wt              | not performed | not performed                        |
|        | PIK3CA wt                    | PIK3CA wt            | not performed | not performed                        |
| MEL-3  | BRAF wt                      | BRAF wt              | BRAF wt       | BRAF wt                              |
|        | NRAS p.Gln61Arg (8.4%)       | NRAS p.Gln61Arg      | not performed | not performed                        |
|        | KRAS wt                      | KRAS wt              | not performed | not performed                        |
|        | PIK3CA wt                    | PIK3CA wt            | not performed | not performed                        |
| MEL-4  | BRAF p.Val600Glu (31.3%)     | BRAF p.Val600Glu     | not performed | not performed                        |
|        | NRAS wt                      | NRAS wt              | not performed | not performed                        |
|        | KRAS wt                      | KRAS wt              | not performed | not performed                        |
|        | PIK3CA wt                    | PIK3CA wt            | not performed | not performed                        |
| MEL-5  | BRAF p.Val600Arg (23.8%)     | BRAF p.Val600Arg     | not performed | not performed                        |

|               |  |                                                 |                                      |               |               |
|---------------|--|-------------------------------------------------|--------------------------------------|---------------|---------------|
|               |  | NRAS wt                                         | NRAS wt                              | not performed | not performed |
|               |  | KRAS wt                                         | KRAS wt                              | not performed | not performed |
|               |  | PIK3CA wt                                       | PIK3CA wt                            | not performed | not performed |
| <b>MEL-6</b>  |  | BRAF p.Val600Glu (46.1%)                        | BRAF p.Val600Glu                     | not performed | not performed |
|               |  | NRAS wt                                         | NRAS wt                              | not performed | not performed |
|               |  | KRAS wt                                         | KRAS wt                              | not performed | not performed |
|               |  | PIK3CA p.Met1043Ile (44.2%); p.Ile391Met (63.9) | PIK3CA p.Met1043Ile; wt*             | not performed | not performed |
| <b>MEL-11</b> |  | BRAF p.Val600Glu complex (38.1%)                | BRAF p.Val600Glu complex/p.Val600Asp | not performed | not performed |
|               |  | NRAS wt                                         | NRAS wt                              | not performed | not performed |
|               |  | KRAS wt                                         | KRAS wt                              | not performed | not performed |
|               |  | PIK3CA wt                                       | PIK3CA wt                            | not performed | not performed |
| <b>MEL-12</b> |  | BRAF p.Val600Lys (60.9%)                        | BRAF p.Val600Lys                     | not performed | not performed |
|               |  | NRAS wt                                         | NRAS wt                              | not performed | not performed |
|               |  | KRAS wt                                         | KRAS wt                              | not performed | not performed |
|               |  | PIK3CA wt                                       | PIK3CA wt                            | not performed | not performed |
| <b>MEL-13</b> |  | BRAF p.Val600_Lys601delinsGlu (44.0%)           | BRAF p.Val600_Lys601delinsGlu        | not performed | not performed |
|               |  | NRAS wt                                         | NRAS wt                              | not performed | not performed |
|               |  | KRAS wt                                         | KRAS wt                              | not performed | not performed |
|               |  | PIK3CA wt                                       | PIK3CA wt                            | not performed | not performed |

\*mutation not covered by the panel

**Table S3.** Analysis of samples with BRAF mutated allele at low frequency: comparison of results among different methods.

| SAMPLE        | NGS (mutant allele fraction) | Sequenom  | HRMA+Sanger           | Conventional methods                                         |
|---------------|------------------------------|-----------|-----------------------|--------------------------------------------------------------|
|               |                              |           |                       | castPCR for <i>BRAF</i> p.Val600Glu (mutant allele fraction) |
| <b>MEL-15</b> | BRAF p.Val600Glu (3.62%)     | BRAF wt   | BRAF wt               | BRAF p.Val600Glu (1.49%)                                     |
|               | NRAS wt                      | NRAS wt   | not performed         | not performed                                                |
|               | KRAS wt                      | KRAS wt   | not performed         | not performed                                                |
|               | PIK3CA wt                    | PIK3CA wt | not performed         | not performed                                                |
| <b>MEL-21</b> | BRAF p.Val600Arg (4.9%)      | BRAF wt   | BRAF <b>ambiguous</b> | BRAF p.Val600Arg (8.99%)                                     |
|               | NRAS p.Gln61Lys (19.5%)      | NRAS wt   | NRAS p.Gln61Lys       | not performed                                                |
|               | KRAS wt                      | KRAS wt   | not performed         | not performed                                                |
|               | PIK3CA wt                    | PIK3CA wt | not performed         | not performed                                                |

**Table S4.** Analysis of samples with a rarer *BRAF* mutation: comparison of results among different methods.

| SAMPLE       | NGS (mutant allele fraction) | Sequenom           | HRMA+Sanger      | Conventional methods                                         |
|--------------|------------------------------|--------------------|------------------|--------------------------------------------------------------|
|              |                              |                    |                  | castPCR for <i>BRAF</i> p.Val600Glu (mutant allele fraction) |
| <b>MEL-7</b> | BRAF p.Asn581Ser (44.2%)     | BRAF wt *          | BRAF p.Asn581Ser | not performed                                                |
|              | NRAS wt                      | NRAS wt            | not performed    | not performed                                                |
|              | KRAS wt                      | KRAS wt            | not performed    | not performed                                                |
|              | PIK3CA p.Cys420Arg (13.9%)   | PIK3CA p.Cys420Arg | not performed    | not performed                                                |

|               |                          |                 |                  |               |
|---------------|--------------------------|-----------------|------------------|---------------|
| <b>MEL-8</b>  | BRAF p.Asp594Asn (52.1%) | BRAF wt *       | BRAF p.Asp594Asn | not performed |
|               | NRAS p.Gly12Asp (63.4%)  | NRAS p.Gly12Asp | NRAS p.Gly12Asp  | not performed |
|               | KRAS wt                  | KRAS wt         | not performed    | not performed |
|               | PIK3CA wt                | PIK3CA wt       | not performed    | not performed |
| <b>MEL-9</b>  | BRAF p.Leu597Gln (25.3%) | BRAF wt *       | BRAF p.Leu597Gln | not performed |
|               | NRAS wt                  | NRAS wt         | not performed    | not performed |
|               | KRAS wt                  | KRAS wt         | not performed    | not performed |
|               | PIK3CA wt                | PIK3CA wt       | not performed    | not performed |
| <b>MEL-10</b> | BRAF p.Gly596Val (52.6%) | BRAF wt *       | BRAF p.Gly596Val | not performed |
|               | NRAS wt                  | NRAS wt         | not performed    | not performed |
|               | KRAS wt                  | KRAS wt         | not performed    | not performed |
|               | PIK3CA wt                | PIK3CA wt       | not performed    | not performed |
| <b>MEL-14</b> | BRAF p.Asp594Asn (36.8%) | BRAF wt *       | BRAF p.Asp594Asn | not performed |
|               | NRAS wt                  | NRAS wt         | not performed    | not performed |
|               | KRAS p.Gln61His (61.2%)  | KRAS p.Gln61His | KRAS p.Gln61His  | not performed |
|               | PIK3CA wt                | PIK3CA wt       | not performed    | not performed |

\*mutation not covered by the panel

**Table S5.** Analysis of wild type samples both for *BRAF* and *NRAS* genes by conventional methods: comparison of results with NGS analysis.

| SAMPLE        | NGS (mutant allele fraction)       | Sequenom  | Conventional methods |                                                              |
|---------------|------------------------------------|-----------|----------------------|--------------------------------------------------------------|
|               |                                    |           | HRMA+Sanger          | castPCR for <i>BRAF</i> p.Val600Glu (mutant allele fraction) |
| <b>MEL-16</b> | BRAF wt                            | BRAF wt   | BRAF wt              | BRAF wt                                                      |
|               | NRAS wt                            | NRAS wt   | not performed        | not performed                                                |
|               | KRAS wt                            | KRAS wt   | not performed        | not performed                                                |
|               | PIK3CA wt                          | PIK3CA wt | not performed        | not performed                                                |
| <b>MEL-17</b> | BRAF wt                            | BRAF wt   | BRAF wt              | BRAF wt                                                      |
|               | NRAS wt                            | NRAS wt   | not performed        | not performed                                                |
|               | KRAS wt                            | KRAS wt   | not performed        | not performed                                                |
|               | PIK3CA wt                          | PIK3CA wt | not performed        | not performed                                                |
| <b>MEL-18</b> | BRAF wt                            | BRAF wt   | BRAF wt              | BRAF wt                                                      |
|               | NRAS wt                            | NRAS wt   | not performed        | not performed                                                |
|               | KRAS wt                            | KRAS wt   | not performed        | not performed                                                |
|               | PIK3CA wt                          | PIK3CA wt | not performed        | not performed                                                |
| <b>MEL-19</b> | BRAF p.Gly466Arg in exon11 (36.0%) | BRAF wt*  | BRAF wt              | BRAF wt                                                      |
|               | NRAS wt                            | NRAS wt   | not performed        | not performed                                                |
|               | KRAS wt                            | KRAS wt   | not performed        | not performed                                                |
|               | PIK3CA wt                          | PIK3CA wt | not performed        | not performed                                                |
| <b>MEL-20</b> | BRAF p.Gly466Arg in exon11 (31.5%) | BRAF wt*  | BRAF wt              | BRAF wt                                                      |
|               | NRAS wt                            | NRAS wt   | not performed        | not performed                                                |
|               | KRAS wt                            | KRAS wt   | not performed        | not performed                                                |
|               | PIK3CA wt                          | PIK3CA wt | not performed        | not performed                                                |

\*mutation not covered by the panel

---
